# Supplementary material for: Synergistic Effect of a Flavonoid-Rich Cocoa–Carob Blend and Metformin in Preserving Pancreatic Beta Cells in Zucker Diabetic Fatty Rats
Source: MDPI journal article supplement (doi:10.3390/nu16020273), 2024-01-17
Supplement: s1 [file s1]

### Supporting information:

## **Synergistic effect of a flavonoid-rich cocoa–carob blend and metformin in preserving pancreatic beta cells in Zucker diabetic fatty rats**

Paula Gallardo-Villanueva, Tamara Fernández-Marcelo, Laura Villamayor, Angela M. Valverde, Sonia Ramos, Elisa Fernández-Millán, María Angeles Martín

**\*Supplementary Table S1.- Biochemical parameters** of Zucker lean rats (ZL); Zucker diabetic rats (ZDF); Zucker diabetic rats treated with metformin (ZDF (M)); Zucker diabetic rats fed with a CCB-rich diet (ZDF (CCB)), and Zucker diabetic rats treated with metformin and fed with a CCB-rich diet (ZDF (CCB+M)). Data represent the means  $\pm$  SD of 6-8 animals. Means in a row without a common letter differ;  $p < 0.05$ .

|                                | <i>ZL</i>                     | <i>ZDF</i>                    | <i>ZDF (M)</i>                | <i>ZDF (CCB)</i>              | <i>ZDF (CCB+M)</i>            |
|--------------------------------|-------------------------------|-------------------------------|-------------------------------|-------------------------------|-------------------------------|
| Final body weight (g)          | 377 $\pm$ 17 <sup>a</sup>     | 3930 $\pm$ 13 <sup>b</sup>    | 423 $\pm$ 38 <sup>c</sup>     | 384 $\pm$ 26 <sup>c</sup>     | 411 $\pm$ 30 <sup>a</sup>     |
| Fasting glucose levels (mg/dL) | 93.5 $\pm$ 14.3 <sup>a</sup>  | 290.0 $\pm$ 32.7 <sup>b</sup> | 173.3 $\pm$ 16.9 <sup>c</sup> | 182.6 $\pm$ 19.0 <sup>c</sup> | 122.6 $\pm$ 16.0 <sup>a</sup> |
| HbA1c (%)                      | 4.8 $\pm$ 1.5 <sup>a</sup>    | 19.3 $\pm$ 3.2 <sup>b</sup>   | 5.3 $\pm$ 2.0 <sup>a</sup>    | 14.3 $\pm$ 2.0 <sup>c</sup>   | 4.6 $\pm$ 2.0 <sup>a</sup>    |
| Insulinemia (ng/dL)            | 0.45 $\pm$ 0.08 <sup>a</sup>  | 0.37 $\pm$ 0.06 <sup>b</sup>  | 0.53 $\pm$ 0.09 <sup>b</sup>  | 0.51 $\pm$ 0.08 <sup>b</sup>  | 0.49 $\pm$ 0.10 <sup>b</sup>  |
| HOMA-IR                        | 2.2 $\pm$ 0.4 <sup>a</sup>    | 8.7 $\pm$ 1.8 <sup>b</sup>    | 4.8 $\pm$ 1.0 <sup>c</sup>    | 4.4 $\pm$ 0.9 <sup>c</sup>    | 5.2 $\pm$ 1.6 <sup>c</sup>    |
| HOMA-B                         | 189.2 $\pm$ 14.8 <sup>a</sup> | 17.6 $\pm$ 5.1 <sup>b</sup>   | 48.8 $\pm$ 13.2 <sup>c</sup>  | 52.7 $\pm$ 13.3 <sup>c</sup>  | 63.8 $\pm$ 12.3 <sup>d</sup>  |

\*Data obtained from *García-Díez et al, Antioxidants 2022, 11, 432*

“García-Díez, E.; López-Oliva, M.E.; Caro-Vadillo, A.; Pérez-Vizcaíno, F.; Pérez-Jiménez, J.; Ramos, S.; Martín, M.Á. Supplementation with a Cocoa–Carob Blend, Alone or in Combination with Metformin, Attenuates Diabetic Cardiomyopathy, Cardiac Oxidative Stress and Inflammation in Zucker Diabetic Rats. *Antioxidants* **2022**, 11, 432.
